# Supplementary material
Source: publisher site journal article supplement (https://jmir.org/api/download?alt_name=mededu_v11i1e57424_app3.pdf&filename=39b668e1-da96-11ef-9b69-e57530adaf64.pdf)
Supplement: Supplementary file [file download]

# Qualitative Interview Timeline

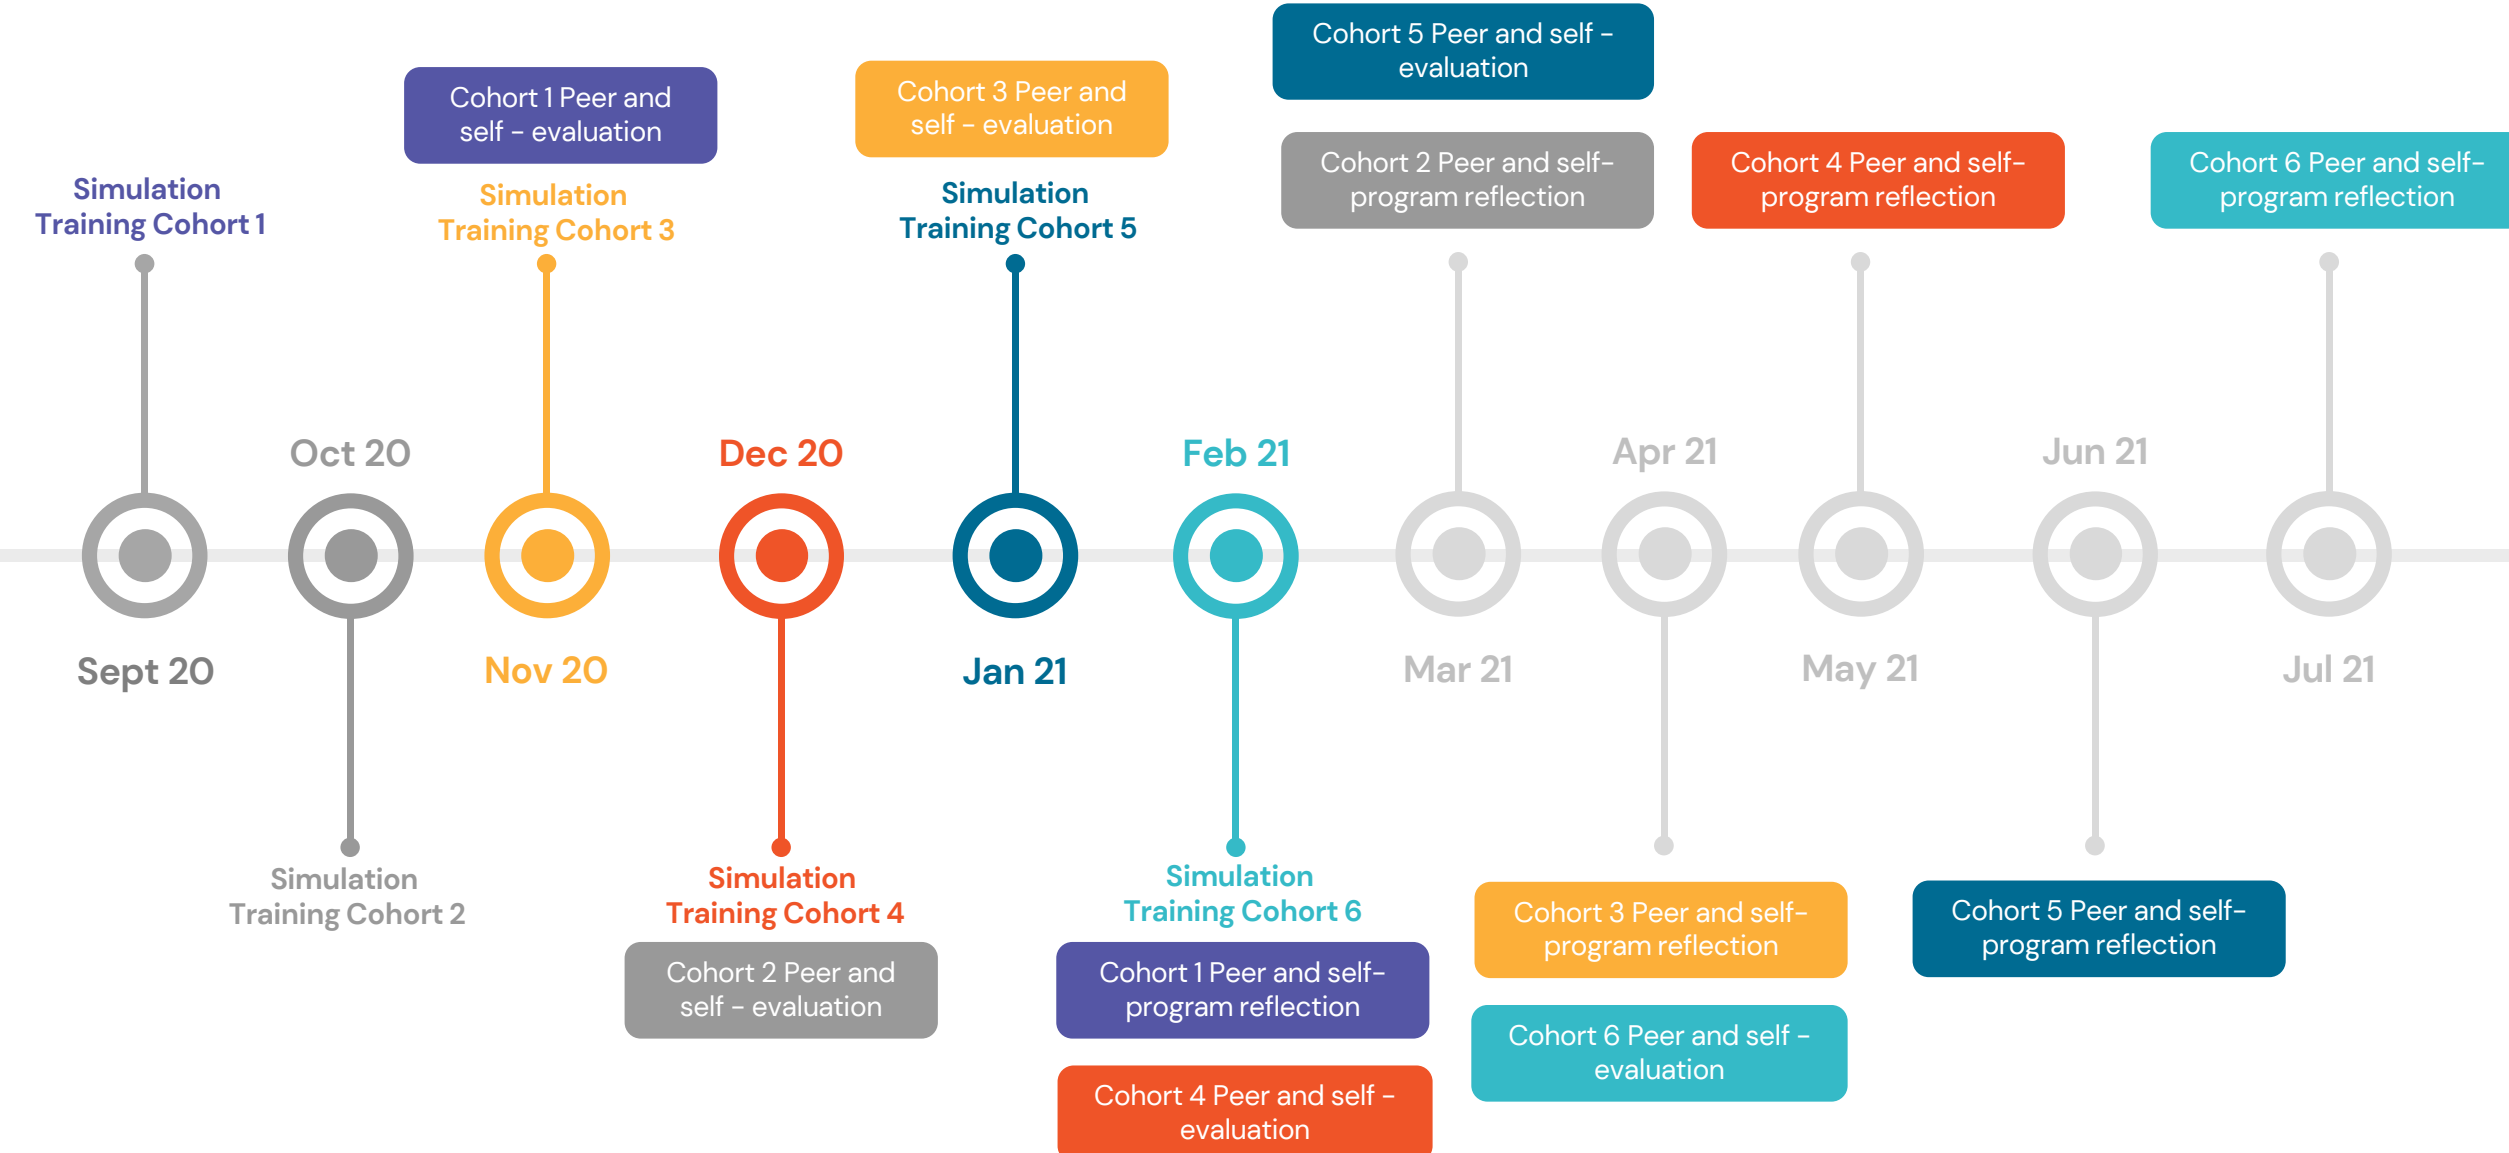

- 2-month post-intervention: Peer & Self-Evaluation
- 5-month post-intervention : Peer & Self- Program Reflection
